# Supplementary material for: Increasing the Sustainability of the Stabilization/Solidification of Potentially Toxic Elements Contained in Tailings from an Active Mine Using a Modified Lime Mortar
Source: MDPI journal article supplement (doi:10.3390/su16062320), 2024-03-11
Supplement: s1 [file s1]

Archive with 1 entries (1 files):
- sustainability-2855649-supplementary.pdf
